# Supplementary material for: Fabrication of Biomedical Ti-Zr-Nb by Reducing Metal Oxides with Calcium Hydride
Source: MDPI journal article supplement (doi:10.3390/jfb14050271), 2023-05-13
Supplement: s1 [file s1]

# SUPPLEMENTARY MATERIAL

## Fabrication of Biomedical Ti-Zr-Nb by Reducing Metal Oxides with Calcium Hydride

Sergey Yudin <sup>1,2,3,\*</sup>, Ivan Alimov <sup>1,2</sup>, Sergey Volodko <sup>1,4</sup>, Alexander Gurianov <sup>1,2</sup>, Galina Markova <sup>2</sup>, Anatoly Kasimtsev <sup>1,2</sup>, Tatiana Sviridova <sup>1,5</sup>, Darya Permyakova <sup>2</sup>, Evgeny Evstratov <sup>6</sup>, Vladimir Cheverikin <sup>7</sup> and Dmitry Moskovskikh <sup>4,\*</sup>

<sup>1</sup> Directorate, L.L.C. Metsintez, Tula 300041, Russia; alimov.iwann@mail.ru (I.A.); volodko.sv@yandex.ru (S.V.); alex19021861@gmail.com (A.G.); metsintez@yandex.ru (A.K.); tim-17@yandex.ru (T.S.)

<sup>2</sup> Mechanical Engineering and Materials Science Department, Tula State University, Tula 300012, Russia; galv.mark@rambler.ru (G.M.); darya.per@gmail.com (D.P.)

<sup>3</sup> Center for Project Activities of the Moscow Polytechnic University, Moscow Polytechnic University, Moscow 107023, Russia

<sup>4</sup> Center of Functional Nano-Ceramics, National University of Science and Technology MISIS, Moscow 119049, Russia

<sup>5</sup> Institute of New Materials and Nanotechnology, National University of Science and Technology MISIS, Moscow 119049, Russia

<sup>6</sup> The Department of Surface Physics and Chemistry and Ultrafine Powder Materials, A. A. Baikov Institute of Metallurgy and Material Science of the Russian Academy of Sciences, Moscow 119334, Russia; eev@imet.ac.ru

<sup>7</sup> Department of Physical Metallurgy of Non-Ferrous Metals, National University of Science and Technology MISIS, Moscow 119049, Russia; cheverikin80@rambler.ru

\* Correspondence: sergey-usn@mail.ru (S.Y.); mos@misis.ru (D.M.)

**Table S1.** Design matrix.

| Temperature, °C | Exposure, h | $\beta$ -Ti, % vol. | Pressing method* |
|-----------------|-------------|---------------------|------------------|
| 900             | 0.0         | 0.0                 | 0                |
| 900             | 2.0         | 0.0                 | 0                |
| 900             | 4.0         | 0.0                 | 0                |
| 900             | 6.0         | 0.0                 | 0                |
| 900             | 8.0         | 0.0                 | 0                |
| 1000            | 4.0         | 10.9                | 0                |
| 1000            | 6.0         | 10.3                | 0                |
| 1050            | 4.0         | 53.8                | 0                |
| 1050            | 6.0         | 50.5                | 0                |
| 1100            | 0.5         | 55.2                | 0                |
| 1100            | 1.0         | 59.8                | 0                |
| 1100            | 2.0         | 70.2                | 0                |
| 1100            | 4.0         | 72.2                | 0                |
| 1100            | 6.0         | 70.7                | 0                |
| 1150            | 4.0         | 56.3                | 0                |
| 1150            | 6.0         | 59.4                | 0                |
| 1200            | 0.0         | 62.7                | 0                |
| 1200            | 2.0         | 69.7                | 0                |
| 1200            | 4.0         | 75.7                | 0                |
| 1200            | 6.0         | 79.4                | 0                |
| 1200            | 10.0        | 84.2                | 0                |
| 1200            | 12.0        | 93.2                | 0                |
| 1100            | 0.5         | 55.2                | 0                |
| 1100            | 1.0         | 59.8                | 0                |
| 1100            | 2.0         | 70.2                | 0                |
| 1150            | 4.0         | 56.3                | 0                |
| 1150            | 6.0         | 59.4                | 0                |
| 1200            | 10.0        | 84.2                | 0                |
| 1200            | 12.0        | 93.2                | 0                |
| 1000            | 4.0         | 13.7                | 1                |
| 1000            | 6.0         | 29.2                | 1                |
| 1050            | 4.0         | 62.2                | 1                |
| 1050            | 6.0         | 55.4                | 1                |
| 1100            | 1.0         | 57.4                | 1                |
| 1100            | 2.0         | 67.5                | 1                |
| 1100            | 4.0         | 65.3                | 1                |
| 1100            | 6.0         | 67.8                | 1                |
| 1150            | 4.0         | 59.9                | 1                |
| 1150            | 6.0         | 62.7                | 1                |
| 1200            | 0.0         | 58.4                | 1                |
| 1200            | 2.0         | 75.7                | 1                |
| 1200            | 4.0         | 78.0                | 1                |
| 1200            | 6.0         | 83.0                | 1                |
| 1000            | 0.0         | 2.9                 | 1                |

\* – 0 – hand pressing of the charge; 1 – hydraulic pressing of the charge under 56 MPa

The pressing predictor, which is a categorical variable, is varied from 0 to 1, where 0 means a low load of 0.7 MPa and 1 means a high load under 56 MPa.

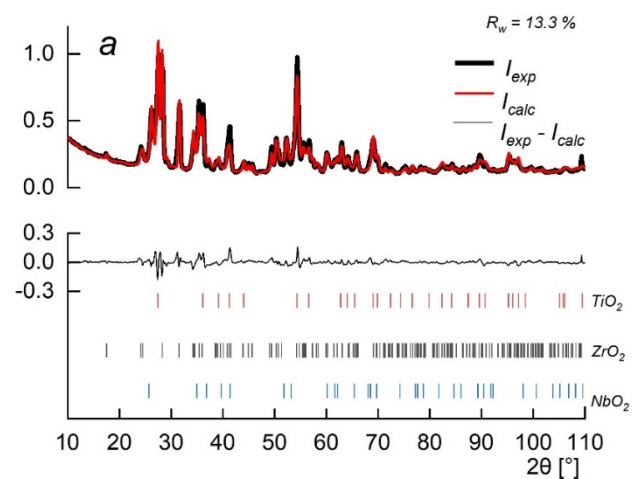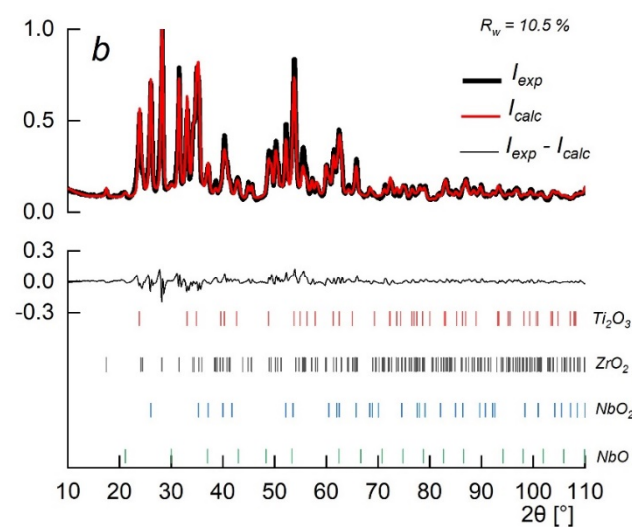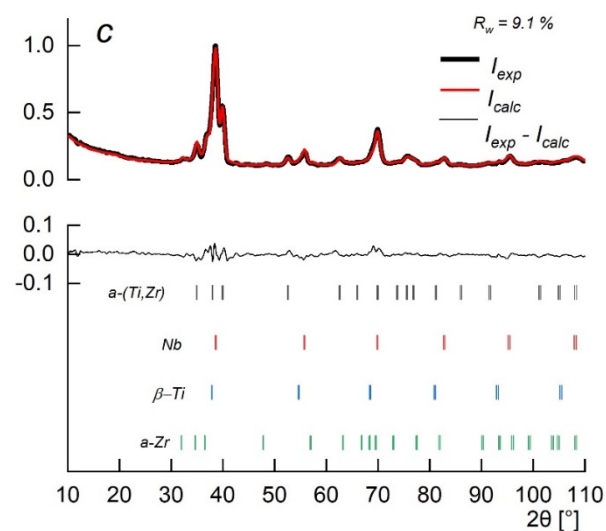

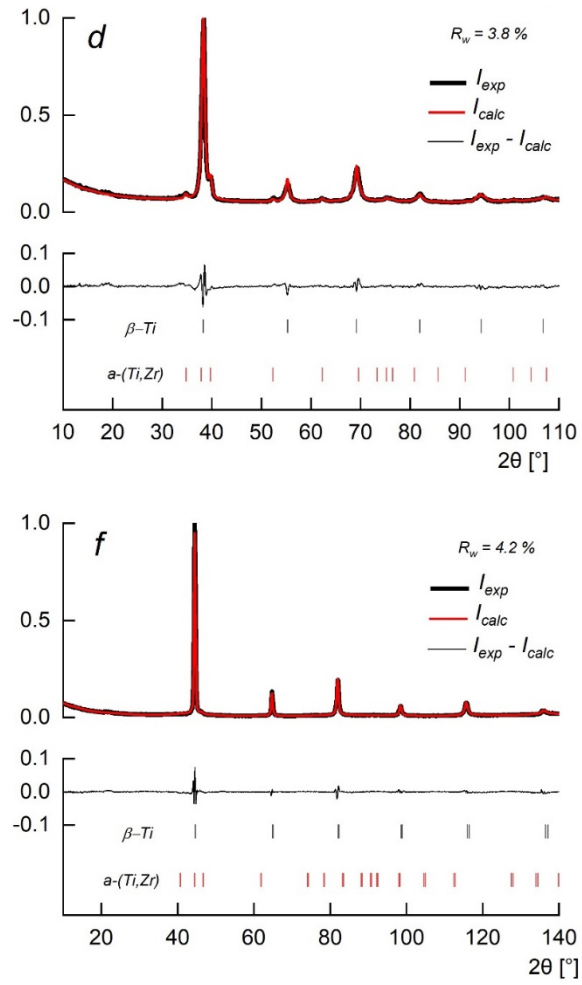

**Figure S1.** Experimental and calculated XRD patterns of calcium-hydride powders synthesized at various temperatures and exposure: *a* – 900 °C, 0 h; *b* – 1000 °C, 0 h; *c* – 1000 °C, 6 h; *d* – 1200, 4 h; *f* – 1200, 12 h. *a*, *c*, *d*, *f* - ( $\rho_{\text{charge}} = 1.4 \text{ g/cm}^3$ ); *b* - ( $\rho_{\text{charge}} = 1.6 \text{ g/cm}^3$ ).  $R_w$  – weighted average Bragg *R*-factor.

**Table S2.** Several structural parameters of the phases, which Bragg positions are shown in Figure S1.

Figure S1.

| Phase                          | Structure type (s.g.) | Lattice parameters                            | Phase content      |                    |
|--------------------------------|-----------------------|-----------------------------------------------|--------------------|--------------------|
|                                |                       |                                               | Weight fraction, % | Volume fraction, % |
| Graph a)                       |                       |                                               |                    |                    |
| TiO <sub>2</sub>               | P 42/m n m (136)      | a= 4.597<br>c= 2.961                          | 65.7               | 72.2               |
| ZrO <sub>2</sub>               | P 1 21/c 1 (14)       | a= 5.138<br>b= 5.200<br>c= 5.309<br>β=99.226  | 25.4               | 20.7               |
| NbO <sub>2</sub>               | P 42/m n m (136)      | a= 4.838<br>c= 2.990                          | 8.9                | 7.1                |
| Graph b)                       |                       |                                               |                    |                    |
| ZrO <sub>2</sub>               | P 1 21/c 1 (14)       | a= 5.140<br>b= 5.199<br>c= 5.310<br>β =99.196 | 31.5               | 27.8               |
| Ti <sub>2</sub> O <sub>3</sub> | R -3 c (167)          | a= 5.145<br>c= 13.655                         | 53.3               | 59.2               |
| NbO <sub>2</sub>               | P 42/m n m (136)      | a= 4.838<br>c= 2.990                          | 13.2               | 11.5               |
| NbO                            | P m -3 m (221)        | a= 4.207                                      | 2.1                | 1.5                |
| Graph c)                       |                       |                                               |                    |                    |
| β-Ti                           | I m -3 m (229)        | a= 3.345                                      | 11.3               | 10.3               |
| Nb                             | I m -3 m (229)        | a= 3.296                                      | 24.4               | 17.9               |
| α-Zr                           | P 63/m m c (194)      | a= 3.201<br>c= 5.133                          | 7.8                | 7.6                |
| α-(Ti,Zr)                      | P 63/m m c (194)      | a= 2.966<br>c= 4.742                          | 56.5               | 64.2               |
| Graph d)                       |                       |                                               |                    |                    |
| β-Ti                           | I m -3 m (229)        | a= 3.325                                      | 80.6               | 75.7               |
| α-(Ti,Zr)                      | P 63/m m c (194)      | a= 2.981<br>c= 4.754                          | 19.4               | 24.6               |
| Graph f)                       |                       |                                               |                    |                    |
| β-Ti                           | I m -3 m (229)        | a= 3.343                                      | 94.9               | 93.2               |
| α-(Ti,Zr)                      | P 63/m m c (194)      | a= 2.978<br>c= 4.837                          | 5.1                | 5.4                |

\* The solid solution of Zr and Nb in Ti lattice is referred as  $\beta$ -Ti in the table and in the corresponding Figure S2;  $\alpha$ -(Ti,Zr) indicates that there is the difference between a calculated lattice parameter and the parameter of pure  $\alpha$ -Ti.

The calcium-hydride powders of Ti, Zr, and Nb possess a spongy-type morphology regardless of the morphology of initial oxides ( $\text{TiO}_2$ ,  $\text{ZrO}_2$ , and  $\text{Nb}_2\text{O}_5$ ) (Figure S2).

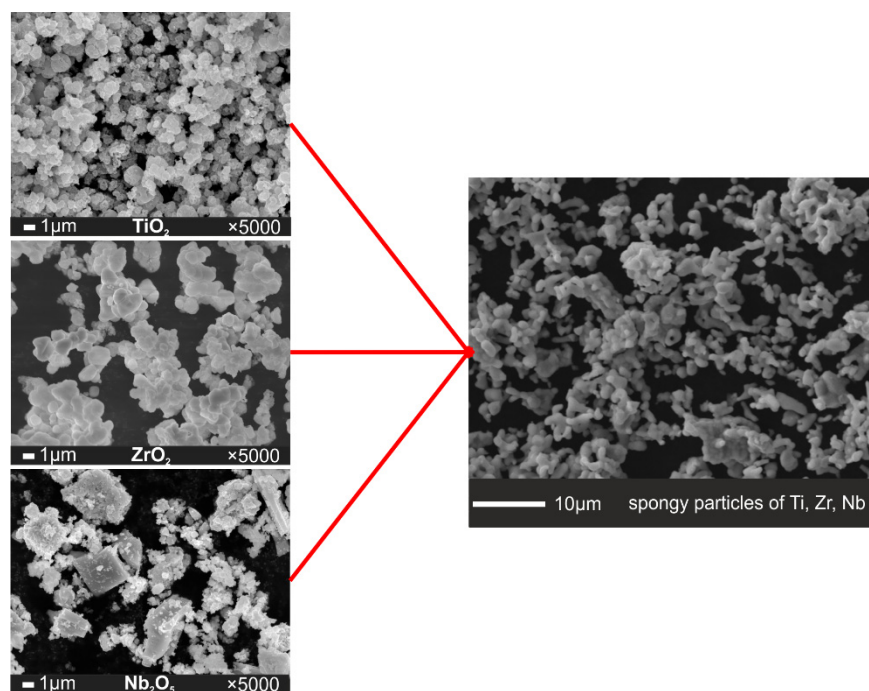

**Figure S2.** Typical morphology of Ti, Zr, and Nb reduced by calcium hydride.

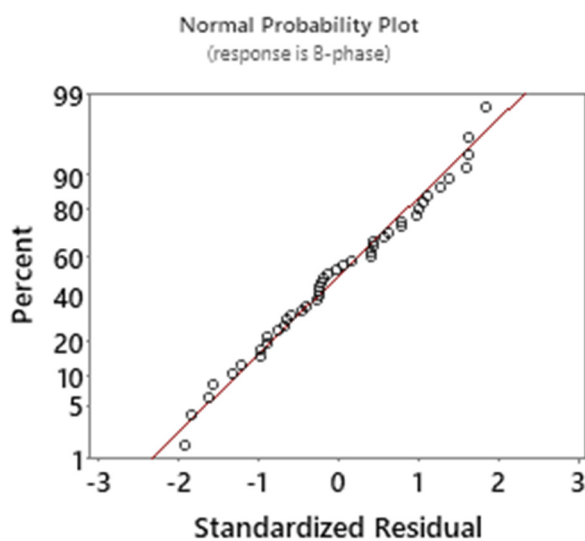

**Figure S3.** Normal probability plot of standardized residuals for the elaborated model.
